# Supplementary material for: Distinct microglial transcriptomic signatures within the hippocampus
Source: PubMed Central journal article supplement (PMC10775894; doi:10.1371/journal.pone.0296280), 2024-01-05

A

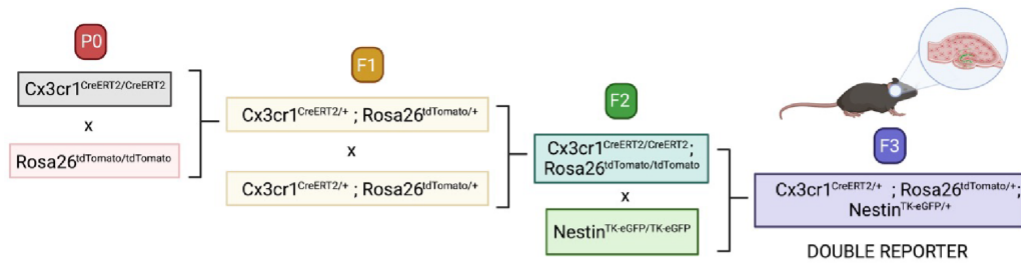

B

| Sample Name        | PE-/AF488- | PE-/AF488+ | PE+/AF488- | PE+/AF488+ | Count |
|--------------------|------------|------------|------------|------------|-------|
| WT unstained       | 0          | 0          | 0          | 100        | 1453  |
| WT + TMEM119       | 0          | 0          | 95.8       | 4.06       | 977   |
| tdTomato           | 94.2       | 0.046      | 0.046      | 5.72       | 2166  |
| tdTomato + Tmem119 | 4.68       | 88.1       | 4.68       | 2.50       | 641   |

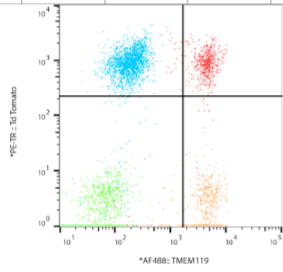

C

| Sample Name             | PE-/FITC-/APC- | PE-/FITC+/APC- | PE+/FITC-/APC- | PE+/FITC+/APC- | Count |
|-------------------------|----------------|----------------|----------------|----------------|-------|
| WT unstained            | 0              | 0              | 0              | 0              | 1452  |
| WT CD11b + CD45         | 0              | 0.13           | 0              | 0              | 1398  |
| tdTomato unstained      | 0              | 0              | 1.28           | 0              | 895   |
| tdTomato + CD11b        | 0              | 0.084          | 95.2           | 0              | 1129  |
| tdTomato + CD11b + CD45 | 0              | 95.0           | 0              | 0              | 800   |

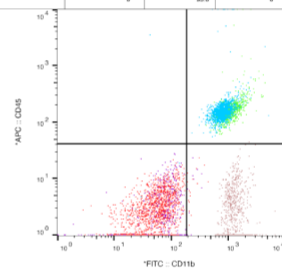

D

| Sample Name           | FITC-/APC+ | FITC+/APC+ | FITC+/APC- | FITC-/APC- | Count |
|-----------------------|------------|------------|------------|------------|-------|
| Unstained             | 0.35       | 0.36       | 0.74       | 98.5       | 16391 |
| Isotype FITC          | 0.17       | 0.60       | 3.92       | 95.3       | 21030 |
| Isotype APC           | 8.98       | 0.94       | 0.21       | 89.9       | 14348 |
| Cd11b-FITC only       | 0.005      | 0.73       | 31.2       | 68.1       | 18452 |
| Cd45-APC only         | 46.3       | 1.08       | 0.072      | 52.6       | 18103 |
| Cd11b-FITC + Cd45-APC | 21.4       | 18.3       | 2.23       | 58.0       | 30371 |

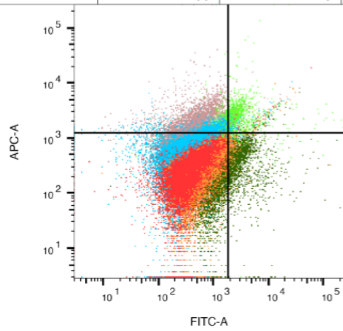

Supplement: pone.0296280.s001.pdf [file pone.0296280.s001.pdf]
