# Supplementary material for: Distinct microglial transcriptomic signatures within the hippocampus
Source: PubMed Central journal article supplement (PMC10775894; doi:10.1371/journal.pone.0296280), 2024-01-05

Subgranular Zone

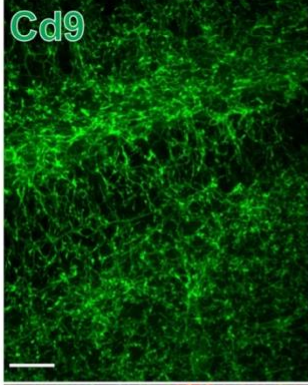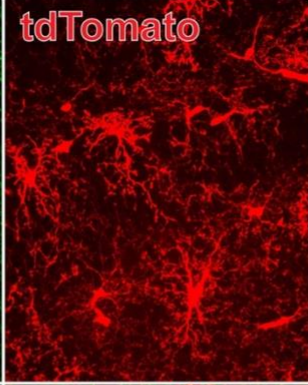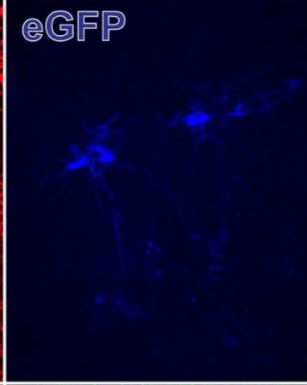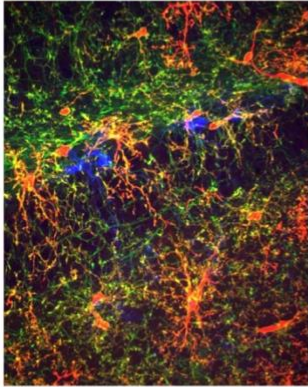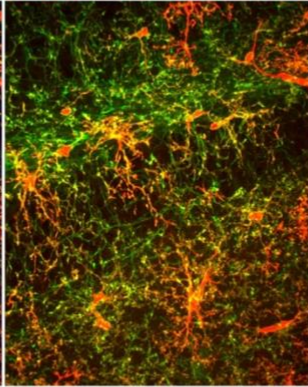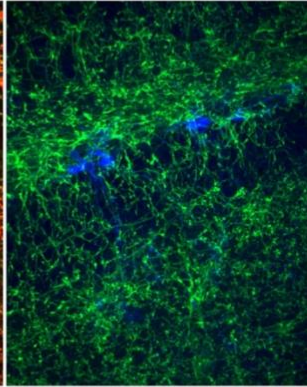

Cortex

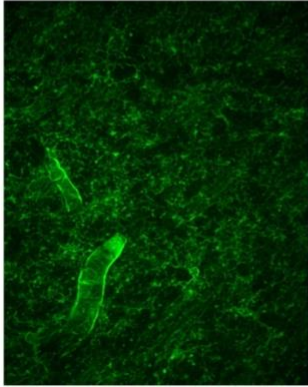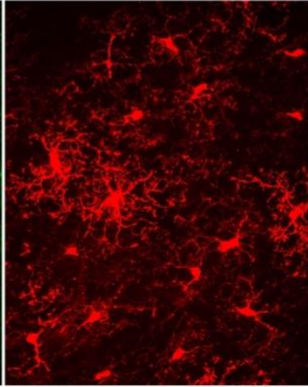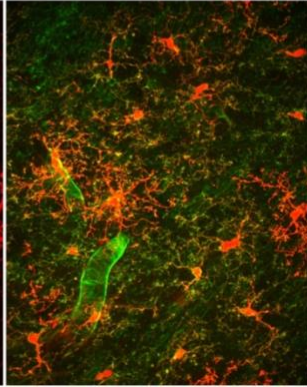

Supplement: pone.0296280.s007.pdf [file pone.0296280.s007.pdf]
